# Supplementary material
Source: HighWire-hosted journal article supplement (https://ebm.bmj.com/content/bmjebm-2024-113543)
Supplement: inline-supplementary-material-7 [file inline-supplementary-material-7.xlsx]

## Sheet: Round 1
Supplementary material 7: Outcomes and definitions uploaded to Delphi Manager
Round 1
Name	HelpText	DomainName
Oropharyngeal dysphagia severity	Changes in overall severity of swallowing difficulty	General swallowing related outcomes
Dry mouth	Changes in how the mouth feels in terms of dryness	General swallowing related outcomes
Drooling	Changes in frequency and severity of saliva leaking out of the mouth	General swallowing related outcomes
Salivary pooling	Changes in amount of saliva accumulated in the mouth or throat	General swallowing related outcomes
Orolingual bolus control	Changes in control over food/liquids in the mouth	General swallowing related outcomes
Oral bolus transport	Changes in the movement of food/liquids through the mouth	General swallowing related outcomes
Lingual muscle strength	Changes in strength of tongue muscles	General swallowing related outcomes
Nasal regurgitation	Changes in frequency of food/liquids going the wrong way - into the nose	General swallowing related outcomes
Swallowing related orolingual movements	Changes in tongue "pumping" or "rocking" movements when eating/drinking	General swallowing related outcomes
Timing of oropharyngeal swallow components	Changes in timing of swallow components in the mouth/throat, e.g. swallow is faster/slower	General swallowing related outcomes
Laryngeal elevation	Changes in upwards movement of the voice box (larynx) when swallowing	General swallowing related outcomes
Laryngeal sensation	Changes in feeling of food/liquids being stuck in the throat	General swallowing related outcomes
Swallowing related hyoid bone movement	Changes in movement of a specific bone in the throat when swallowing	General swallowing related outcomes
Pharyngeal muscle strength	Changes in strength of throat muscles	General swallowing related outcomes
Initiation of pharyngeal swallow	Changes in overall speed of swallowing	General swallowing related outcomes
Postswallow oral residue	Changes in food/liquids left in the mouth after swallowing	General swallowing related outcomes
Postswallow pharyngeal residue	Changes in food/liquids left in the throat after swallowing	General swallowing related outcomes
Postswallow pharyngeal pooling	Changes in food/liquids accumulating in the throat after swallowing	General swallowing related outcomes
Piecemeal deglutition	Changes in need to break down food/liquids in the mouth in order to swallow	General swallowing related outcomes
Penetration/aspiration	Changes in frequency of food/liquids going the wrong way - into the airway/windpipe	General swallowing related outcomes
Choking	Changes in frequency of choking episodes	General swallowing related outcomes
Medication intake	Changes in swallowing Parkinson's medication	General swallowing related outcomes
Weight loss	Changes in body weight related to swallowing difficulties	General swallowing related outcomes
Voice parameters	Changes in voice, e.g. loudness, voice quality	General non-swallowing related outcomes
Level of oral intake	Changes in how food/liquids are taken (e.g., via mouth, feeding tube, pureed diet, thickened liquids)	Nutritional and dietary outcomes
Hydration	Changes in hydration status	Nutritional and dietary outcomes
Avoidance of food/liquids	Changes in avoidance of food/liquids related to swallowing difficulties	Nutritional and dietary outcomes
Respiratory swallow coordination	Changes in the coordination of breathing and swallowing	Respiratory outcomes
Cough production	Changes in cough strength so the airway/windpipe can be cleared easier	Respiratory outcomes
Cough sensitivity	Changes in coughing as a response of feeling food/liquids going down the wrong way	Respiratory outcomes
Aspiration pneumonia	Changes in frequency of chest infections	Respiratory outcomes
Mealtime duration	Changes in the duration of a mealtime related to swallowing difficulties	Physical functioning
Independent eating/drinking	Changes in level of independence while eating/drinking	Physical functioning
Social aspect of eating/drinking	Changes in social activities because of swallowing difficulties	Social functioning
Pleasure of oral intake	Changes in pleasure of eating/drinking related to swallowing	Emotional functioning/wellbeing
Fear of eating/drinking	Changes in fear or anxiety related to eating/drinking	Emotional functioning/wellbeing
Fear of choking	Changes in fear or anxiety of choking related to eating/drinking	Emotional functioning/wellbeing
Swallowing related quality of life	Changes in quality of life related to swallowing difficulties	Global quality of life
Self-perception of swallowing	Changes in overall awareness of swallowing function	Perceived health status
Carer burden	Changes in caregiver's quality of life related to swallowing difficulties in person with Parkinson's	Delivery of care
Participant's experience with intervention	Opportunity to give feedback on overall swallowing program	Delivery of care
Participant's adherence to intervention	Person with Parkinson's following the intervention as prescribed	Delivery of care
Hospitalisation	Changes in number of hospital admissions related to swallowing difficulties	Hospital
Adverse events	Unfavorable or harmful side effects that occur during or after the swallowing treatment	Adverse events/effects
Mortality	The event of death	Mortality/survival

## Sheet: Round 2
Round 2
Name	HelpText	DomainName
Oropharyngeal dysphagia severity	Changes in overall severity of swallowing difficulty	General swallowing related outcomes
Laryngeal sensation	Changes in feeling of food/liquids/saliva being stuck in the larynx (voice box)	General swallowing related outcomes
Postswallow pharyngeal residue	Changes in food/liquids/saliva left in the throat after swallowing	General swallowing related outcomes
Penetration/aspiration	Changes in frequency of food/liquids/saliva going the wrong way - into the airway/windpipe	General swallowing related outcomes
Choking	Changes in frequency of choking episodes	General swallowing related outcomes
UES opening during swallowing	Changes in opening of the Upper Esophageal Sphincter (short UES). The UES is the junction of the throat and the oesophagus that opens during swallowing, allowing food/liquids/saliva to flow through without interruption.	General swallowing related outcomes
Hydration	Changes in hydration status	Nutritional and dietary outcomes
Cough strength	Changes in cough strength so the airway/windpipe can be cleared easier	Respiratory outcomes
Cough sensitivity	Changes in coughing as a response of feeling food/liquids/saliva going down the wrong way	Respiratory outcomes
Aspiration pneumonia	Changes in frequency of aspiration pneumonia. Aspiration pneumonia is a lung inflammation that is caused by food/liquids/saliva going into the airway/windpipe.	Respiratory outcomes
Swallowing related quality of life	Changes in quality of life related to swallowing difficulties	Global quality of life
Adverse events	Unfavorable or harmful side effects that occur during or after the swallowing treatment	Adverse events/effects
Mortality	The event of death	Mortality/survival
Note: changes made between rounds are highlighted in red

## Sheet: Round 3
Round 3
Name	HelpText	DomainName
Oropharyngeal dysphagia severity	Changes in overall severity of swallowing difficulty	General swallowing related outcomes
Laryngeal sensation	Changes in feeling of food/liquids/saliva being stuck in the larynx (voice box)	General swallowing related outcomes
Postswallow pharyngeal residue	Changes in food/liquids/saliva left in the throat after swallowing	General swallowing related outcomes
Penetration/aspiration	Changes in frequency of food/liquids/saliva going the wrong way - into the airway/windpipe	General swallowing related outcomes
Choking	Changes in frequency of choking episodes. Choking is a blockage of the upper airway by food/liquids/saliva, which can disrupt breathing.	General swallowing related outcomes
Hydration	Changes in hydration status	Nutritional and dietary outcomes
Cough strength	Changes in cough strength so the airway/windpipe can be cleared easier	Respiratory outcomes
Cough sensitivity	Changes in coughing as a response of feeling food/liquids/saliva going down the wrong way	Respiratory outcomes
Aspiration pneumonia	Changes in frequency of aspiration pneumonia. Aspiration pneumonia is a lung inflammation that is caused by food/liquids/saliva going into the airway/windpipe.	Respiratory outcomes
Swallowing related quality of life	Changes in quality of life related to swallowing difficulties	Global quality of life
Adverse events	Unfavorable or harmful side effects that occur during or after the swallowing treatment	Adverse events/effects
Mortality	The event of death	Mortality/survival
Note: changes made between rounds are highlighted in red
